# Supplementary material for: Working during a Pandemic between the Risk of Being Infected and/or the Risks Related to Social Distancing: First Validation of the SAPH@W Questionnaire
Source: MDPI journal article supplement (doi:10.3390/ijerph18115986), 2021-06-02
Supplement: s1 [file s1]

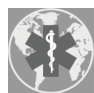

**Table S1.** Latent mean differences: Gender, ecological risk level, and type of occupation.

|                       | Gender:<br>Female <sup>a</sup> |       | Ecological risk level:<br>High-risk zone <sup>b</sup> |       | Type of occupation:<br>Remote working <sup>c</sup> |       |
|-----------------------|--------------------------------|-------|-------------------------------------------------------|-------|----------------------------------------------------|-------|
|                       | Mean                           | SE    | Mean                                                  | SE    | Mean                                               | SE    |
| Communication         | -0.118                         | 0.082 | -0.012                                                | 0.082 | -0.209 **                                          | 0.080 |
| Decision-making       | -0.165                         | 0.089 | -0.164                                                | 0.089 | -0.177 *                                           | 0.089 |
| Situational awareness | -0.173 *                       | 0.087 | -0.019                                                | 0.087 | -0.190 *                                           | 0.087 |
| Fatigue management    | -0.174                         | 0.093 | -0.245 **                                             | 0.093 | -0.157                                             | 0.095 |
| Personal contribution | -0.191 **                      | 0.068 | -0.071                                                | 0.068 | -0.096                                             | 0.068 |

Note: SE is standard error; <sup>a</sup>—The reference group for gender was male; <sup>b</sup>—The reference group for ecological risk level was low-risk zone; <sup>c</sup>—The reference group for type of occupation was in person; \* $p < .05$ . \*\* $p < .01$ .
